# Supplementary material for: Practice-based Research Program Promotes Dietitians' Participation in Research
Source: Atypon-hosted journal article supplement (doi:10.3148/cjdpr-2015-034), 2015-11-16
Supplement: cjdpr-2015-034suppl.pdf [file cjdpr-2015-034suppl.pdf]

# Dietitians in the research challenge survey

---

## Participation Survey

Thank you for agreeing to take part in this survey!

This important survey will help us evaluate the experience of dietitians who have participated in one or more of the Practice-based Research Challenges. This survey should only take 5-10 minutes to complete. Be assured that all answers you provide will be kept confidential. Please click 'Next' to begin.

### **Your participation in this survey is voluntary.**

All responses are kept confidential, and the organizers of the Research Challenge will not be aware of your decision regarding participation in the survey. Should you decide to not complete the survey, your participation in the Research Challenge will not be affected.

### **How many years have you been practicing as a dietitian?**

Include years worked at other institutions.

- ☐ 0-1 years
- ☐ 2-5 years
- ☐ 6-10 years
- ☐ 11-19 years
- ☐ 20+ years

### **What is your highest level of education?**

- ☐ Baccalaureate
- ☐ Masters
- ☐ PhD
- ☐ Other, please specify... \_\_\_\_\_

**Did you have any interest in doing research prior to the Research Challenge?**

- ☐ Yes - very much
- ☐ Yes - somewhat
- ☐ No

**During your internship (and not as part of a Research Challenge) ...**

Yes   No

Did you plan a practice-based research project?   ☐   ☐

Did you implement a practice-based research project?   ☐   ☐

**During your years in practice (and not as an intern or as part of a Research Challenge) ...**

Yes   No

Did you plan a practice-based research project?   ☐   ☐

Did you implement a practice-based research project?   ☐   ☐

**Why did you apply to participate in the Research Challenge?**

Please check all that apply.

- ☐ Career advancement
- ☐ Needed research experience
- ☐ Project was of interest to me
- ☐ Project was in my field of expertise
- ☐ Project contributed to or was part of my Masters or PhD program
- ☐ To improve patient care
- ☐ To change practice guidelines
- ☐ To increase my knowledge or understanding of an issue
- ☐ Other. Please specify. \_\_\_\_\_

### **What were the benefits of participating in the Research Challenge?**

Please check all that apply.

- ☐ Gain research knowledge, skills and experience
- ☐ Improve patient care
- ☐ Access to an experienced researcher (your mentor) for help
- ☐ Career advancement or change
- ☐ Professional development
- ☐ Change a practice guideline
- ☐ Raise awareness of research role in evidence-based practice
- ☐ Raise awareness of research to others in my unit
- ☐ Interdisciplinary collaboration
- ☐ Other, please specify... \_\_\_\_\_

### **What were the challenges of participating in the Research Challenge?**

Please check all that apply.

- ☐ Finding time to commit to the project
- ☐ Recruiting participants
- ☐ Data collection
- ☐ Data analysis
- ☐ Insufficient mentorship
- ☐ Research Challenge workshops did not provide enough skills, knowledge to complete project
- ☐ Lack of support from others in your unit
- ☐ Other, please specify... \_\_\_\_\_

**Having participated in a Research Challenge, will you conduct further practice-based research projects in the next 5 years?**

1 = not at all likely; 5 = very likely

- ☐ 1
- ☐ 2
- ☐ 3
- ☐ 4
- ☐ 5

**Considering your experience in the Research Challenge, please select the response below that best describes your overall satisfaction level with the Research Challenge:**

1 = Very Satisfied; 5 = Very Dissatisfied

- ☐ 1
- ☐ 2
- ☐ 3
- ☐ 4
- ☐ 5

**Please select how likely it is that you would recommend participating in a Research Challenge to a friend or colleague:**

1 = not at all likely; 5 = very likely

- ☐ 1
- ☐ 2
- ☐ 3
- ☐ 4
- ☐ 5

**Finally, is there anything else you would like to tell us about your experience in the Research Challenge?**

**Thank you! Click the "Submit" button below to submit your survey.**
